# Supplementary material
Source: bioRxiv or medRxiv preprint supplement (https://www.biorxiv.org/highwire/filestream/117847/field_highwire_adjunct_files/9/122135-2.pdf)
Supplement: Supplementary file [file 122135-2.pdf]

## Datasets for FACS proportional analysis

| Lab/FACS library  | Short Read Archive Accession |
|-------------------|------------------------------|
| 1. Pearson X1     | SRR2009674                   |
| 2. Pearson X1     | SRR2009675                   |
| 3. Pearson X2     | SRR2009676                   |
| 4. Pearson X2     | SRR2009677                   |
| 5. Pearson X1     | SRR496276                    |
| 6. Pearson X2     | SRR496278                    |
| 7. Pearson Xins   | SRR496280                    |
| 8. Rajewsky X1    |                              |
| 9. Rajewsky X2    |                              |
| 10. Rajewsky Xins |                              |
| 11. Reddien X1    | SRR1302023                   |
| 12. Reddien X1    | SRR1302024                   |
| 13. Reddien X2    | SRR1302025                   |
| 14. Reddien X2    | SRR1302026                   |
| 15. Sanchez X1    | SRR2407874                   |
| 16. Sanchez X1    | SRR2407875                   |
| 17. Sanchez X1    | SRR2407876                   |
| 18. Sanchez X1    | SRR2407877                   |
| 19. Sanchez Xins  | SRR2407878                   |
| 20. Sanchez Xins  | SRR2407879                   |
| 21. Sanchez Xins  | SRR2407880                   |
| 22. Sanchez Xins  | SRR2407881                   |

### Paper references:

A mex3 homolog is required for differentiation during planarian stem cell lineage development. Zhu et al. (2015) ELife

A comparative transcriptomic analysis reveals conserved features of stem cell pluripotency in planarians and mammals. Labbe et al. (2012) Stem Cells

Gene expression of pluripotency determinants is conserved between mammalian and planarian stem cells Onal et al. (2012) EMBO J

Single-cell analysis reveals functionally distinct classes within the planarian stem cell compartment. Van Wolfsinkel et al. (2014) Cell Stem Cell.

Set1 and MLL1/2 Target Distinct Sets of Functionally Different Genomic Loci In Vivo. Duncan et al. (2015) Cell Reports

**Supplemental Figure 2:** A description of the 4 labs from which FACS RNA-seq datasets are available. Corresponding Short Read Archive accession numbers are highlighted with reference paper.
